# Supplementary material for: Plasmodium falciparum population dynamics in East Africa and genomic surveillance along the Kenya-Uganda border
Source: PubMed Central journal article supplement (PMC11300580; doi:10.1038/s41598-024-67623-4), 2024-08-05
Supplement: 41598_2024_67623_MOESM1_ESM.pdf [file 41598_2024_67623_MOESM1_ESM.pdf]

## SUPPLEMENTARY FIGURES

Supplementary Figure S1. Multiplicity of infection across sampling sites included in the East Africa dataset (N = 599) calculated using the inbreeding coefficient ( $F_{ws}$  metric).

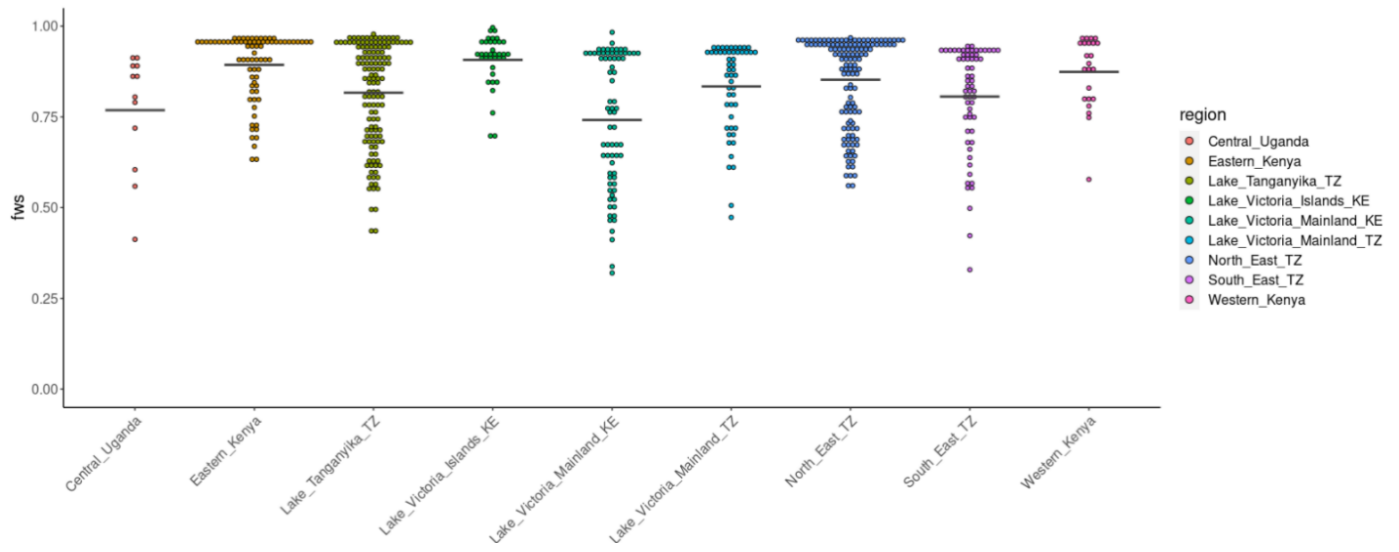

KE Kenya; TZ Tanzania

**Supplementary Figure S2: An *in-silico* model of the protein structure of *P. falciparum* Kelch 13 (K13) protein highlighting codon 568, a WHO candidate for reduced susceptibility to artemisinin. (A,D) Wild-type codon Val568. (B,E) Codon 568 Gly [WHO candidate]. (C,F) Codon 568 Ile [identified in an isolate from Bungoma county, Kenya].**

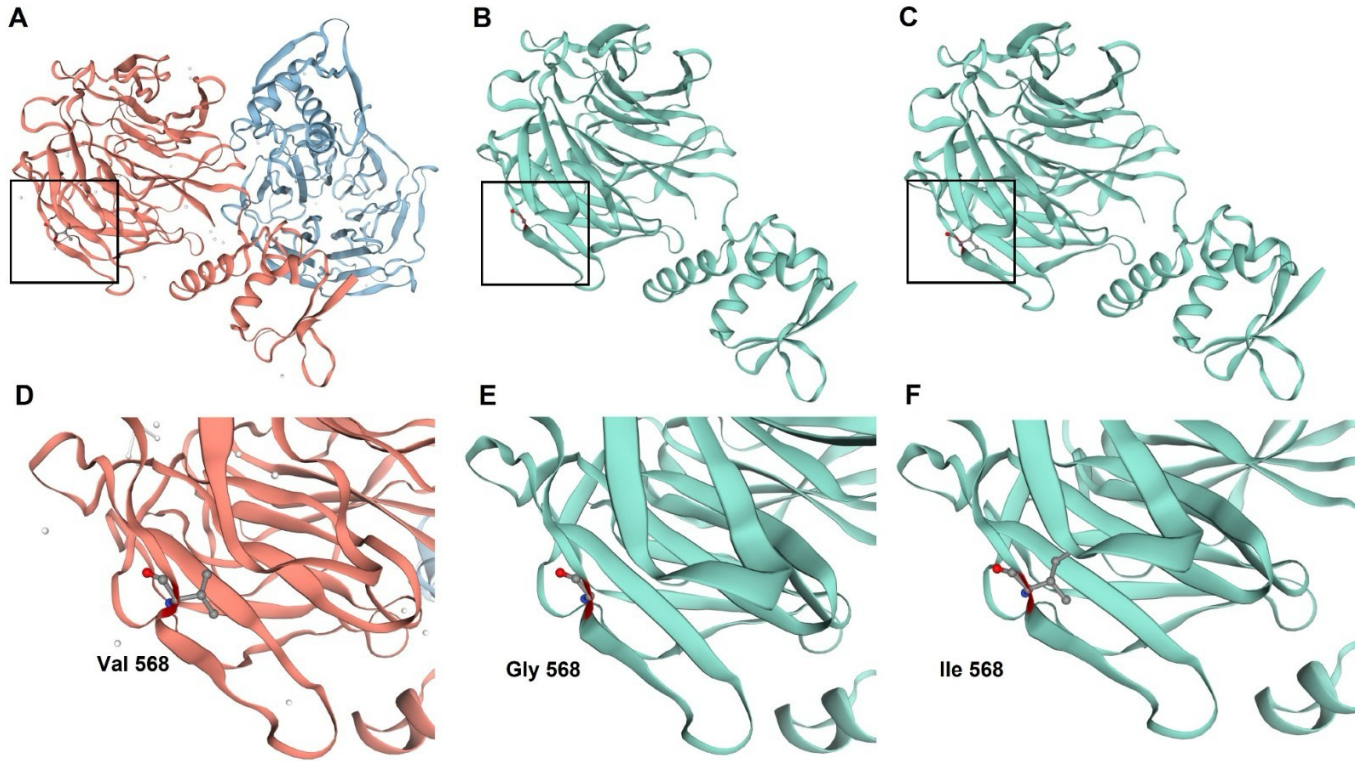

**Supplementary Figure S3. Principal component analysis (PCA) of 365 *P. falciparum* isolates from across the African continent (640,596 genome-wide SNPs). (A and B) Isolates coloured by majority ancestral population (K1-K6). (C and D) Isolates coloured according to country of collection.**

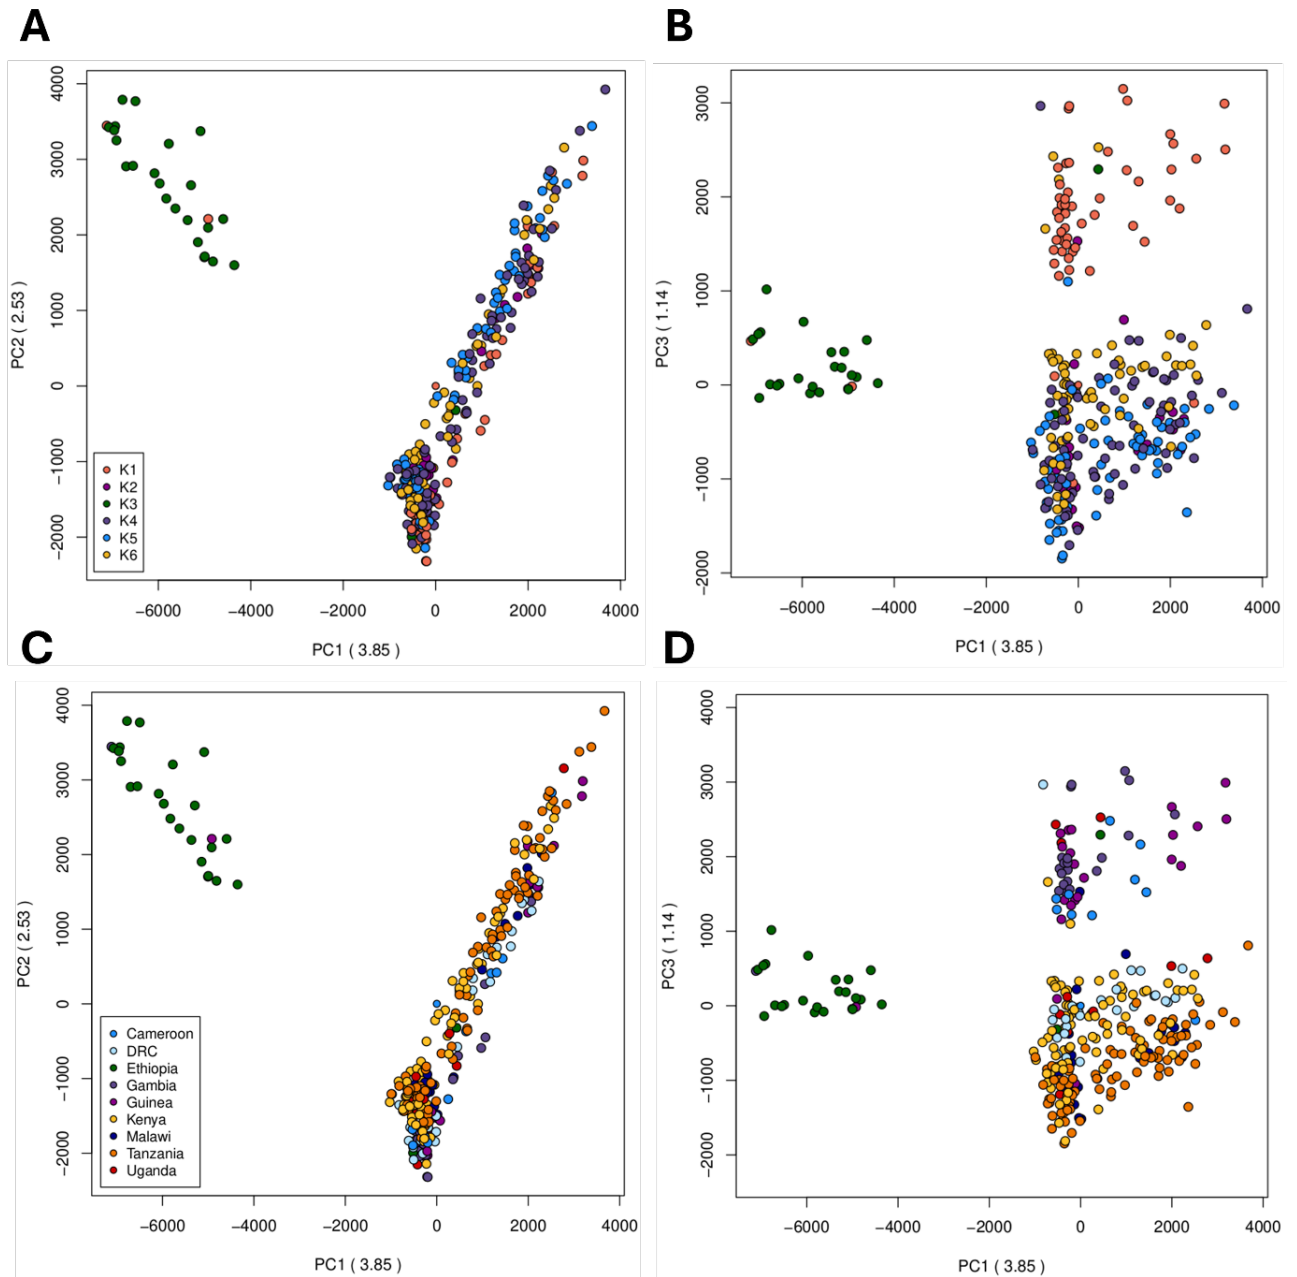

**Supplementary Figure S4. Cumulative genome-wide ancestral admixture proportions for *P. falciparum* populations across Africa and subpopulations within East Africa.** Cumulative percentages of ancestry where K is estimated to be 6.

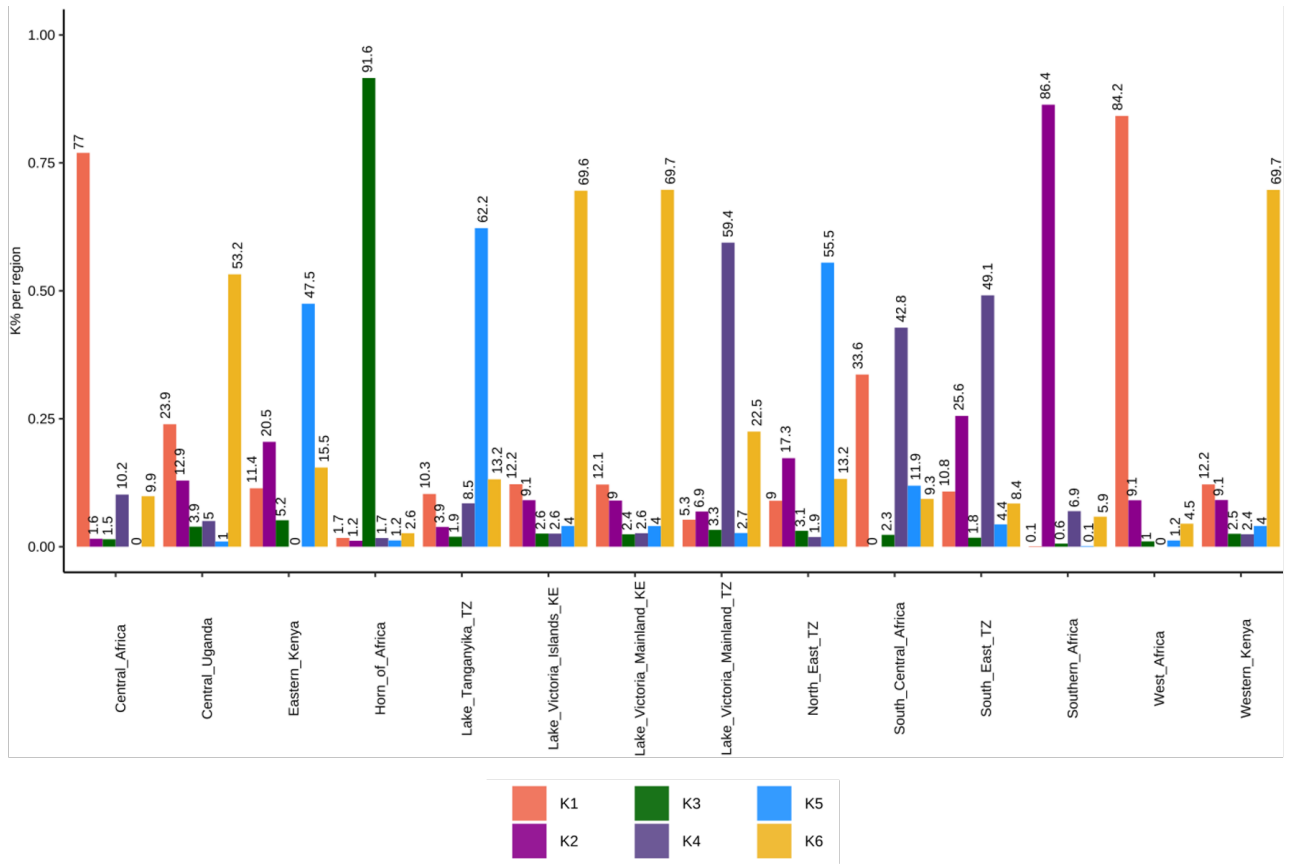

KE Kenya; TZ Tanzania

**Supplementary Figure S5. Identity-by-descent (IBD) fractions in *P. falciparum* isolates from 6 estimated ancestral populations\* within Africa. (A) IBD fractions across the genome by ancestral population. (B) IBD fractions along each chromosome by ancestral population.**

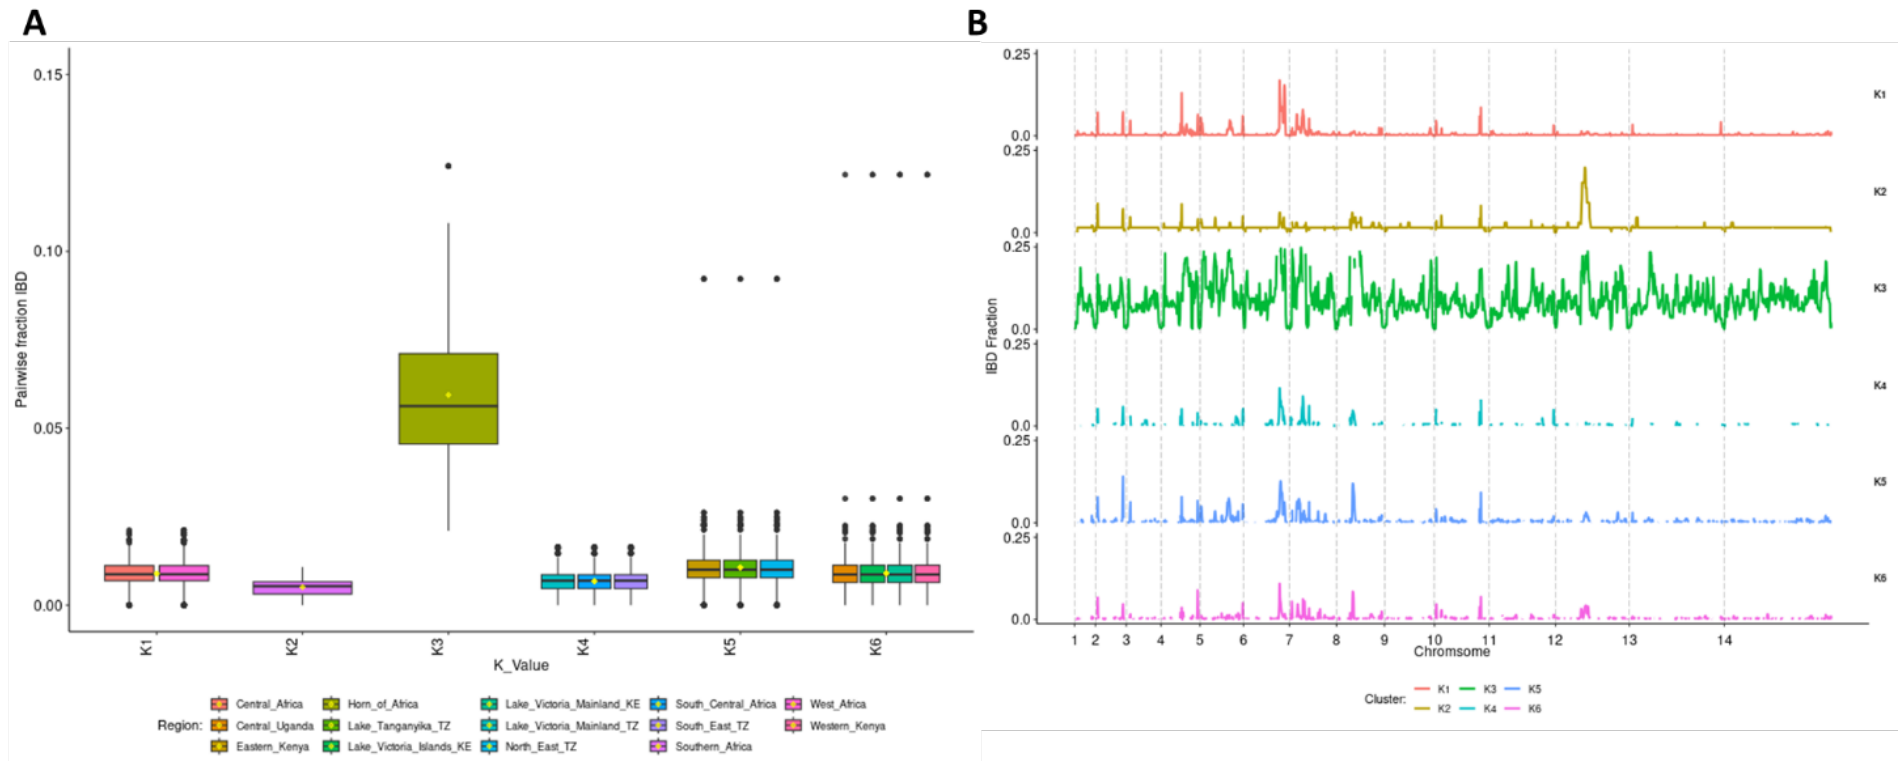

KE Kenya; TZ Tanzania; \*K1 = Central Africa and West Africa; K2 = Southern Africa; K3 = Horn of Africa; K4 = South Central Africa, South East, TZ, Lake Victoria Mainland, KE, TZ; K5 = Eastern Kenya, Lake Tanganyika, TZ, North East, TZ; K6 = Central Uganda, Lake Victoria Islands, KE, Lake Victoria Mainland, KE, Western Kenya.

**Supplementary Figure S6. Signatures of positive selection in East African subpopulations according to their maximum proportion ancestral population\* (K-value).** The genome-wide haplotype structure of isolates was analysed to locate regions of high local homozygosity relative to neutral expectation. (A,B,C) Variants undergoing within-population selection in the inferred K4, K5, and K6 populations with an  $iHS > 4.0$  ( $(-\log_{10}[1 - 2 | \Phi_{iHS} - 0.5 |]) > 4.0$ ). (D,E,F) Cross-population analysis of variants under high positive directional selection ( $-\log_{10}(p\text{-value}) > 5$ ).

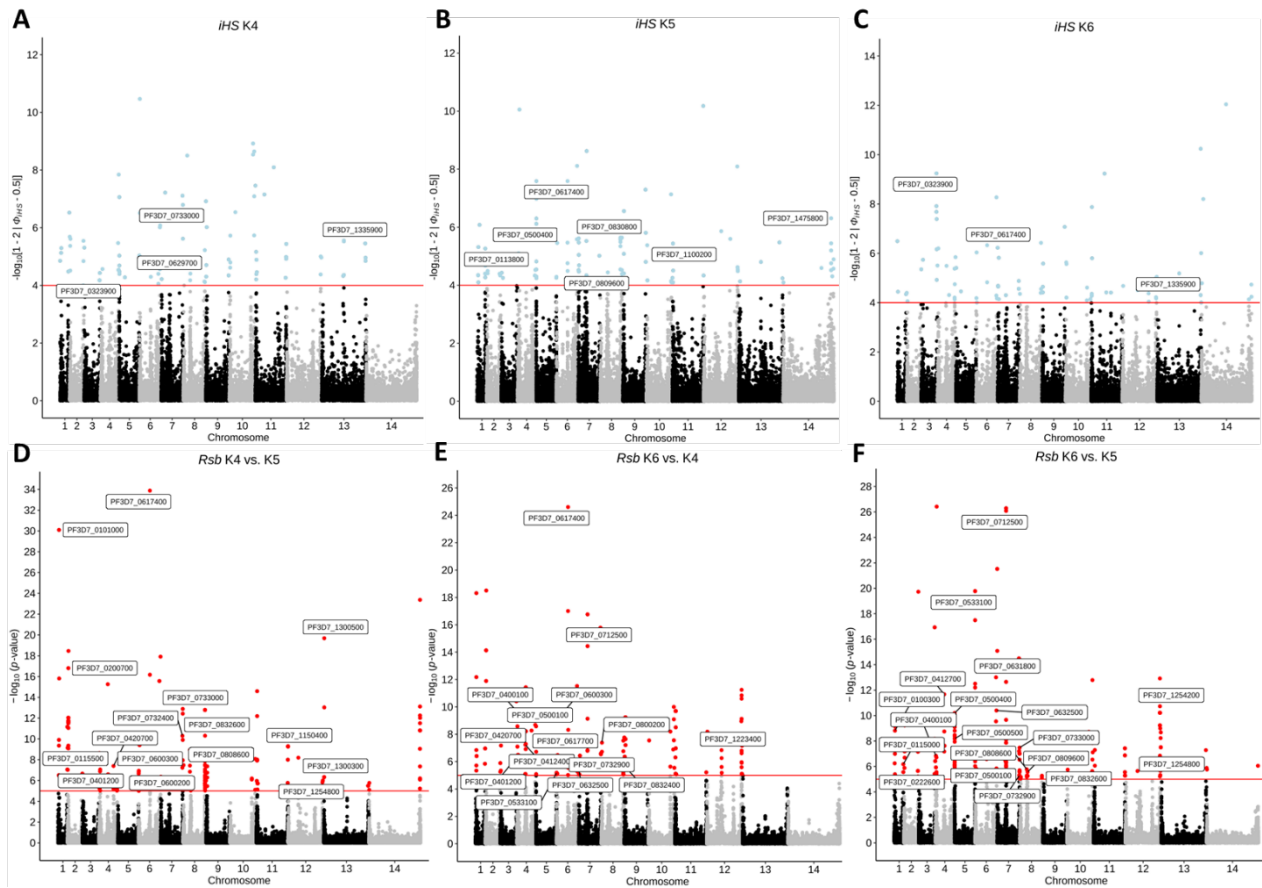

\*K4 = South Central Africa, South East, TZ, Lake Victoria Mainland, KE, TZ; K5 = Eastern Kenya, Lake Tanganyika, TZ, North East, TZ; K6 = Central Uganda, Lake Victoria Islands, KE, Lake Victoria Mainland, KE, Western Kenya.

## SUPPLEMENTARY TABLES

**Supplementary Table S1. Summary data for 599 *P. falciparum* isolates included within East African genome-wide population analyses to characterise population dynamics and identify genetic markers of interest within isolates collected from Western Kenya.**

| Country  | Site            | Region                 | Year       | Samples (N) |
|----------|-----------------|------------------------|------------|-------------|
| Kenya    | Bungoma county  | Western Kenya          | 2018       | 30          |
|          | Suba district   | Lake Victoria mainland | 2020       | 10          |
|          | Mfangano Island | Lake Victoria islands  | 2015, 2020 | 24          |
|          | Ngodhe Island   | Lake Victoria islands  | 2016, 2020 | 12          |
|          | Kilifi          | Eastern Kenya          | 2012       | 74          |
|          | Kisumu          | Lake Victoria mainland | 2014       | 63          |
| Tanzania | Kagera          | Lake Victoria mainland | 2013       | 51          |
|          | Kigoma          | Lake Tanganyika        | 2014       | 133         |
|          | Lindi           | Southeast Tanzania     | 2013       | 62          |
|          | Tanga           | Northeast Tanzania     | 2014       | 128         |
| Uganda   | Apac            | Central Uganda         | 2010       | 12          |

**Supplementary Table S2. Summary data for 365 *P. falciparum* isolates included within African genome-wide population analyses.**

| <b>Region</b>        | <b>Country</b>               | <b>Year</b>                  | <b>Samples (N)</b> |
|----------------------|------------------------------|------------------------------|--------------------|
| East Africa          | Kenya (Western Kenya)        | 2018                         | 21                 |
|                      | Kenya                        | 2012, 2014, 2015, 2016, 2020 | 86                 |
|                      | Tanzania                     | 2013, 2014                   | 99                 |
|                      | Uganda                       | 2010                         | 12                 |
| West Africa          | Guinea                       | 2011                         | 22                 |
|                      | Gambia                       | 2014                         | 25                 |
| Horn of Africa       | Ethiopia                     | 2013                         | 25                 |
| South Central Africa | Democratic Republic of Congo | 2014                         | 25                 |
| Central Africa       | Cameroon                     | 2013                         | 25                 |
| Southern Africa      | Malawi                       | 2011                         | 25                 |



**Supplementary Table S3. Non-synonymous single nucleotide polymorphisms (SNPs) in known drug resistance genes.** Known resistance-conferring variants highlighted in **bold**.

| Gene          | Position | Ref | Alt | Variant       | Western Kenya N* | Western Kenya MAF | Max. $F_{st}$ | East Africa MAF (n = 460) | LV Kenya MAF (n = 109) | West Africa MAF (n = 50) |
|---------------|----------|-----|-----|---------------|------------------|-------------------|---------------|---------------------------|------------------------|--------------------------|
| <i>Pfcr</i>   | 403291   | G   | T   | D24Y          | 36               | 19.4              | 0.00327       | 7.7                       | 7.3                    | 11.0                     |
|               | 403625   | A   | C   | <b>K76T</b>   | 36               | 2.8               | 0.00497       | 14.1                      | 15.1                   | 35.0                     |
|               | 403715   | T   | C   | F106S         | 36               | 5.5               | 0             | 0                         | 0.5                    | 0                        |
|               | 404407   | G   | T   | A220S         | 34               | 8.1               | 0.00139       | 14.5                      | 15.1                   | 35.7                     |
|               | 404836   | C   | G   | <b>Q271E</b>  | 34               | 2.9               | 0.00770       | 14                        | 14.8                   | 35.7                     |
|               | 405362   | A   | G   | N326S         | 34               | 0                 | 0             | 0                         | 0                      | 0                        |
|               | 405600   | T   | C   | I356T         | 34               | 0                 | 0             | 0                         | 0                      | 22.0                     |
|               | 405838   | G   | T   | <b>R371I</b>  | 34               | 2.9               | 0.00019       | 14.8                      | 15.3                   | 35.0                     |
|               | 406295   | T   | C   | V418A         | 33               | 6.1               | 0.00005       | 0.1                       | 1.0                    | 0                        |
| <i>Pfdhfr</i> | 748239   | A   | T   | <b>N51I</b>   | 33               | 100               | 0.00244       | 95.1                      | 99.1                   | 96.0                     |
|               | 748262   | T   | C   | <b>C59R</b>   | 33               | 100               | 0.00716       | 86.8                      | 97.2                   | 88.0                     |
|               | 748410   | G   | A   | <b>S108N</b>  | 34               | 100               | 0.00021       | 99.6                      | 99.1                   | 100                      |
|               | 748577   | A   | T   | <b>I164L</b>  | 38               | 2.2               | 0.00058       | 1.2                       | 1.0                    | 2.0                      |
| <i>Pfdhps</i> | 549681   | T   | C   | <b>S436H</b>  | 37               | 21.6              | 0.00006       | 0                         | 0                      | 0                        |
|               | 549685   | G   | C   | <b>G437A</b>  | 37               | 100               | 0.00539       | 89.8                      | 94.5                   | 92.0                     |
|               | 549993   | A   | G   | <b>K540E</b>  | 35               | 97.1              | 0.00337       | 89.7                      | 95.0                   | 49.0                     |
|               | 550117   | C   | G   | <b>A581G</b>  | 37               | 0                 | 0.00702       | 12.9                      | 26.1                   | 5.0                      |
| <i>Pfmdr1</i> | 958145   | A   | T   | <b>N86Y</b>   | 33               | 0                 | 0.00297       | 5.9                       | 3.3                    | 17.0                     |
|               | 958440   | A   | T   | <b>Y184F</b>  | 33               | 54.5              | 0.00006       | 37.7                      | 44.4                   | 48.0                     |
|               | 958484   | A   | T   | T199S         | 32               | 3.1               | 0.01091       | 0.5                       | 0.5                    | 0                        |
|               | 960702   | T   | A   | F938Y         | 34               | 2.9               | 0.00032       | 7.1                       | 1.8                    | 1.0                      |
|               | 961625   | G   | T   | <b>D1246Y</b> | 37               | 10.8              | 0.00020       | 5.0                       | 4.1                    | 5.0                      |
| <i>PfK13</i>  | 1725266  | C   | A   | A578S         | 37               | 5.4               | 0.00037       | 0.1                       | 0                      | 0                        |
|               | 1725296  | C   | T   | <b>V568I</b>  | 37               | 2.7               | 0.01009       | 0                         | 0                      | 0                        |
|               | 1725752  | T   | C   | I416V         | 36               | 2.8               | 0.00046       | 0                         | 0                      | 0                        |
|               | 1725848  | G   | A   | H384Y         | 36               | 2.8               | 0.00046       | 0                         | 0                      | 0                        |
|               | 1726015  | T   | A   | Y328F         | 36               | 2.8               | 0.00046       | 0                         | 0                      | 0                        |
|               | 1726226  | A   | T   | L258M         | 37               | 5.4               | 0.00036       | 0                         | 0                      | 0                        |
|               | 1726234  | C   | T   | R255K         | 38               | 2.6               | 0.00220       | 1.5                       | 1.0                    | 0                        |
|               | 1726432  | T   | G   | K189T         | 35               | 28.6              | 0.01286       | 16.7                      | 20.2                   | 13.0                     |

LV Lake Victoria; MAF minor allele frequency; \* number of isolates with depth of coverage > 5-fold (maximum n=38)

**Supplementary Table S4. Fraction of pairwise identity by descent (IBD) across the genome.**

| <b>Admixture (K value)</b> | <b>Region</b>                                                                                    | <b>Mean IBD</b> | <b>Range</b> |
|----------------------------|--------------------------------------------------------------------------------------------------|-----------------|--------------|
| K1                         | Central Africa<br>West Africa                                                                    | 0.01119         | 0 - 0.92449  |
| K2                         | Southern Africa                                                                                  | 0.01757         | 0 - 0.82675  |
| K3                         | Horn of Africa                                                                                   | 0.08568         | 0 - 0.85013  |
| K4                         | South Central Africa<br>South East Tanzania<br>Lake Victoria Mainland, Tanzania                  | 0.00674         | 0 - 0.01646  |
| K5                         | Eastern Kenya<br>Lake Tanganyika, Tanzania<br>North East Tanzania                                | 0.01065         | 0 - 0.09221  |
| K6                         | Central Uganda<br>Lake Victoria Islands, Kenya<br>Lake Victoria Mainland, Kenya<br>Western Kenya | 0.00899         | 0 - 0.12167  |

TZ Tanzania; KE Kenya

**Supplementary Table S5. Top 5% of identity-by-descent (IBD) regions in East African *P. falciparum* populations by ancestral population\*.**

\*K4 = South Central Africa, South East Tanzania, Lake Victoria Mainland (Kenya, Tanzania); K5 = Eastern Kenya, Lake Tanganyika Tanzania, North East Tanzania; K6 = Central Uganda, Lake Victoria Islands Kenya, Lake Victoria Mainland Kenya, Western Kenya.

| Pop. | chr    | start   | end     | Fraction                                                                     | Gene Product                                                                 | Gene Name               |
|------|--------|---------|---------|------------------------------------------------------------------------------|------------------------------------------------------------------------------|-------------------------|
| K4   | 6      | 1110001 | 1120000 | 0.11485                                                                      | acetyl-CoA synthetase, putative                                              | <i>ACS</i>              |
|      | 6      | 1200001 | 1210000 | 0.05369                                                                      | phospholipase, putative                                                      | <i>PL</i>               |
|      | 7      | 380001  | 390000  | 0.04783                                                                      | heat shock protein 86 family protein                                         | -                       |
|      | 7      | 390001  | 400000  | 0.05848                                                                      | heat shock protein 110                                                       | <i>HSP110c</i>          |
|      | 7      | 390001  | 400000  | 0.05848                                                                      | Cg8 protein                                                                  | -                       |
|      | 7      | 400001  | 410000  | 0.06170                                                                      | <b>chloroquine resistance transporter</b>                                    | <b><i>CRT</i></b>       |
|      | 7      | 420001  | 430000  | 0.07366                                                                      | nucleic acid-binding protein, putative                                       | -                       |
| K5   | 3      | 120001  | 130000  | 0.04329                                                                      | cytoadherence linked asexual protein 3.2                                     | <i>CLAG3.2</i>          |
|      | 3      | 130001  | 140000  | 0.06240                                                                      | cytoadherence linked asexual protein 3.1                                     | <i>CLAG3.1</i>          |
|      | 5      | 840001  | 850000  | 0.04293                                                                      | single-stranded DNA-binding protein                                          | -                       |
|      | 5      | 850001  | 860000  | 0.06154                                                                      | adenosylhomocysteinase                                                       | <i>SAHH</i>             |
|      | 5      | 870001  | 880000  | 0.06174                                                                      | zinc finger protein, putative                                                | -                       |
|      | 5      | 880001  | 890000  | 0.06582                                                                      | ATP-dependent RNA helicase DDX1, putative                                    | <i>DDX1</i>             |
|      | 5      | 900001  | 910000  | 0.06886                                                                      | transcription initiation factor TFIID subunit 10                             | <i>TAF10</i>            |
|      | 6      | 1110001 | 1120000 | 0.06640                                                                      | acetyl-CoA synthetase, putative                                              | <i>ACS</i>              |
|      | 6      | 1200001 | 1210000 | 0.06455                                                                      | phospholipase, putative                                                      | <i>PL</i>               |
|      | 6      | 1250001 | 1260000 | 0.05069                                                                      | alpha/beta hydrolase, putative                                               | -                       |
|      | 7      | 210001  | 220000  | 0.03587                                                                      | HECT-type E3 ubiquitin ligase UT                                             | <i>UT</i>               |
|      | 7      | 220001  | 230000  | 0.05648                                                                      | HECT-type E3 ubiquitin ligase UT                                             | <i>UT</i>               |
|      | 7      | 290001  | 300000  | 0.07217                                                                      | importin-7, putative                                                         | -                       |
|      | 7      | 300001  | 310000  | 0.06765                                                                      | conserved Plasmodium protein                                                 | -                       |
|      | 7      | 310001  | 320000  | 0.06154                                                                      | conserved Plasmodium protein                                                 | -                       |
|      | 7      | 320001  | 330000  | 0.05766                                                                      | conserved Plasmodium protein                                                 | -                       |
|      | 8      | 500001  | 510000  | 0.11938                                                                      | JmjC domain-containing protein, putative                                     | <i>JmjC1</i>            |
|      | 8      | 510001  | 520000  | 0.11624                                                                      | ribosomal protein L33, apicoplast, putative                                  | -                       |
|      | 8      | 510001  | 520000  | 0.11624                                                                      | JmjC domain-containing protein, putative                                     | <i>JmjC1</i>            |
|      | 8      | 540001  | 550000  | 0.07899                                                                      | <b>hydroxymethyldihydropterin pyrophosphokinase-dihydropteroate synthase</b> | <b><i>PPPK-DHPS</i></b> |
| 8    | 540001 | 550000  | 0.07899 | ATP-dependent RNA helicase DBP1, putative                                    | <i>DBP1</i>                                                                  |                         |
| 8    | 550001 | 560000  | 0.04753 | <b>hydroxymethyldihydropterin pyrophosphokinase-dihydropteroate synthase</b> | <b><i>PPPK-DHPS</i></b>                                                      |                         |
| K6   | 6      | 1110001 | 1120000 | 0.10846                                                                      | acetyl-CoA synthetase, putative                                              | <i>ACS</i>              |
|      | 7      | 420001  | 430000  | 0.05765                                                                      | nucleic acid-binding protein, putative                                       | -                       |
|      | 7      | 430001  | 440000  | 0.04455                                                                      | prodrug activation and resistance esterase                                   | <i>PARE</i>             |
|      | 7      | 460001  | 470000  | 0.05460                                                                      | conserved Plasmodium protein                                                 | -                       |
|      | 7      | 930001  | 940000  | 0.02909                                                                      | 40S ribosomal protein S5, putative                                           | -                       |
|      | 8      | 500001  | 510000  | 0.08466                                                                      | JmjC domain-containing protein, putative                                     | <i>JmjC1</i>            |
|      | 8      | 510001  | 520000  | 0.08183                                                                      | ribosomal protein L33, apicoplast, putative                                  | -                       |
|      | 8      | 510001  | 520000  | 0.08183                                                                      | JmjC domain-containing protein, putative                                     | <i>JmjC1</i>            |

|    |        |         |         |                                               |              |
|----|--------|---------|---------|-----------------------------------------------|--------------|
| 12 | 800001 | 810000  | 0.02890 | cell cycle associated protein, putative       | -            |
| 12 | 900001 | 910000  | 0.03656 | AP2 domain transcription factor AP2-G         | <i>AP2-G</i> |
| 12 | 910001 | 920000  | 0.03968 | AP2 domain transcription factor AP2-G         | <i>AP2-G</i> |
| 12 | 920001 | 930000  | 0.04038 | cAMP-dependent protein kinase regulatory sub. | <i>PKAr</i>  |
| 12 | 990001 | 1000000 | 0.03706 | histone chaperone ASF1, putative              | <i>ASF1</i>  |
| 12 | 990001 | 1000000 | 0.03706 | polyadenylate-binding protein 1, putative     | <i>PABP1</i> |
| 12 | 990001 | 1000000 | 0.03706 | WD repeat-containing protein, putative        | -            |
| 12 | 990001 | 1000000 | 0.03706 | WD repeat-containing protein, putative        | -            |

**Supplementary Table S6. SNPs on genes of interest under positive selection pressure within East African *P. falciparum* populations\* ( $iHS$  value  $(-\log_{10}[1 - 2 | \Phi iHS - 0.5 |]) > 4$ ).**

| Pop.      | chr | start   | end     | Markers (N) | Mean <i>iHS</i> | Gene ID (PF3D7_)                                      | Gene products                                                                                |
|-----------|-----|---------|---------|-------------|-----------------|-------------------------------------------------------|----------------------------------------------------------------------------------------------|
| <b>K4</b> | 3   | 990000  | 1020000 | 51          | 0.907           | 0323800 (-);<br>0323600 (-)                           | conserved Plasmodium protein;<br>BSD domain-containing protein, putative                     |
|           | 6   | 1220000 | 1250000 | 11          | 1.678           | 0629700 (SET1)                                        | SET domain protein, putative                                                                 |
|           | 6   | 1320000 | 1350000 | 84          | 0.803           | 0631900 (-)                                           | stevor                                                                                       |
|           | 10  | 1600000 | 1630000 | 165         | 0.717           | 1040200 (-)                                           | stevor                                                                                       |
|           | 13  | 1450000 | 1480000 | 50          | 0.797           | 1336200 (-)                                           | conserved Plasmodium protein                                                                 |
| <b>K5</b> | 1   | 50000   | 90000   | 62          | 0.781           | 0100700 (-)                                           | Plasmodium exported protein,                                                                 |
|           | 1   | 520000  | 550000  | 202         | 0.731           | 0113700 (HSP40);<br>0114000 (EPF1);<br>0113900 (CBP1) | heat shock protein 40, type II;<br>exported protein family 1;<br>CX3CL1-binding protein 1    |
|           | 6   | 710000  | 740000  | 67          | 1.278           | 0617200 (-);<br>0617600 (-);<br>0617100 (-)           | BFR1 domain-containing protein, putative;<br>stevor;<br>AP-2 complex subunit alpha, putative |
|           | 6   | 1330000 | 1350000 | 144         | 0.832           | 0631900 (-)                                           | stevor                                                                                       |
|           | 8   | 480000  | 510000  | 48          | 1.721           | 0809900 (JmjC1)                                       | JmjC domain-containing protein, putative                                                     |
|           | 8   | 1300000 | 1330000 | 246         | 0.684           | 0830600 (-)                                           | Plasmodium exported protein (PHISTc),                                                        |
|           | 10  | 1590000 | 1620000 | 186         | 0.672           | 1040200 (-)                                           | stevor                                                                                       |
|           | 14  | 3110000 | 3140000 | 90          | 0.952           | 1475600 (BDP4)                                        | bromodomain protein 4, putative                                                              |
| <b>K6</b> | 3   | 990000  | 1030000 | 78          | 1.123           | 0323800 (-);<br>0323600 (-);<br>0324600 (-)           | conserved Plasmodium protein;<br>BSD domain-containing protein, putative;<br>stevor          |
|           | 6   | 710000  | 740000  | 31          | 1.347           | 0617200 (-);<br>0617600 (-);<br>0617100 (-)           | BFR1 domain-containing protein, putative;<br>stevor;<br>AP-2 complex subunit alpha, putative |
|           | 6   | 1320000 | 1350000 | 105         | 0.735           | 0631900 (-)                                           | stevor                                                                                       |
|           | 12  | 2200000 | 2240000 | 182         | 0.784           | 1254100 (-)                                           | stevor                                                                                       |
|           | 13  | 1450000 | 1480000 | 59          | 0.660           | 1336200 (-)                                           | conserved Plasmodium protein                                                                 |

**Supplementary Table S7. Cross-population analysis of selection pressure between ancestral populations\* ( $R_{sb} - \log_{10}(p\text{-value}) > 5$ ).**

| Pop.  | chr | start   | end     | Markers (N) | Mean $R_{sb}$ | Gene Name (PF3D7_)                          | Products                                                                                     |
|-------|-----|---------|---------|-------------|---------------|---------------------------------------------|----------------------------------------------------------------------------------------------|
| K1 K2 | 1   | 40000   | 70000   | 71          | 1.634         | 0100700 (-)                                 | Plasmodium exported protein                                                                  |
| K1 K2 | 3   | 110000  | 140000  | 186         | 0.776         | 0302500 (CLAG3.1);<br>0302200 (CLAG3.2)     | cytoadherence linked asexual protein 3.1;<br>cytoadherence linked asexual protein 3.2        |
| K1 K2 | 4   | 1090000 | 1120000 | 180         | 1.064         | 0424300 (EBA165)                            | erythrocyte binding antigen-165                                                              |
| K1 K2 | 5   | 60000   | 90000   | 34          | 0.740         | 0501200 (PIESP2);<br>0501300 (SBP1)         | erythrocyte surface protein;<br>skeleton-binding protein 1                                   |
| K1 K2 | 6   | 1270000 | 1300000 | 127         | 1.788         | 0631100 (-)                                 | Plasmodium exported protein (PHISTb)                                                         |
| K1 K2 | 6   | 1320000 | 1350000 | 118         | 0.630         | 0631900 (-)                                 | stevor                                                                                       |
| K1 K2 | 9   | 1460000 | 1490000 | 69          | 1.535         | 0937000 (-)                                 | Plasmodium exported protein (PHISTb),                                                        |
| K1 K2 | 12  | 820000  | 850000  | 14          | 3.211         | 1221000 (SET10);<br>1220900 (HP1)           | histone-lysine N-methyltransferase;<br>heterochromatin protein 1                             |
| K1 K2 | 12  | 1000000 | 1030000 | 4           | 4.59          | 1225200 (-)                                 | DNA-binding protein, putative                                                                |
| K1 K3 | 1   | 500000  | 530000  | 159         | 0.734         | 0113700 (HSP40)                             | heat shock protein 40, type II                                                               |
| K1 K3 | 2   | 870000  | 900000  | 66          | 0.738         | 0221800 (-)                                 | hypothetical protein                                                                         |
| K1 K4 | 1   | 20000   | 60000   | 137         | 1.514         | 0100700 (-)                                 | Plasmodium exported protein                                                                  |
| K1 K4 | 2   | 870000  | 900000  | 79          | 0.679         | 0221800 (-)                                 | hypothetical protein                                                                         |
| K1 K4 | 3   | 40000   | 70000   | 118         | 0.883         | 0300900 (-);<br>0300400 (-)                 | stevor;<br>stevor                                                                            |
| K1 K4 | 4   | 530000  | 600000  | 284         | 0.935         | 0412100 (mtRPS12)                           | ribosomal protein S12, mitochondrial                                                         |
| K1 K4 | 4   | 920000  | 950000  | 97          | 0.629         | 0420400 (RRF2);<br>0420300 (ApiAP2)         | ribosome-recycling factor;<br>AP2 domain transcription factor, putative                      |
| K1 K4 | 6   | 710000  | 740000  | 105         | 0.737         | 0617200 (-);<br>0617600 (-);<br>0617100 (-) | BFR1 domain-containing protein, putative;<br>stevor;<br>AP-2 complex subunit alpha, putative |
| K1 K4 | 6   | 1250000 | 1300000 | 173         | 2.414         | 0631100 (-);<br>0630100 (-)                 | Plasmodium exported protein (PHISTb);<br>alpha/beta hydrolase, putative                      |
| K1 K4 | 6   | 1320000 | 1350000 | 164         | 0.788         | 0631900 (-)                                 | stevor                                                                                       |
| K1 K4 | 10  | 1380000 | 1410000 | 376         | 0.642         | 1035400 (MSP3);<br>1034900 (MRScyt)         | merozoite surface protein 3;<br>methionine--tRNA ligase                                      |
| K1 K4 | 10  | 1590000 | 1640000 | 357         | 0.931         | 1040200 (-)                                 | stevor                                                                                       |
| K1 K4 | 12  | 1680000 | 1710000 | 123         | 1.075         | 1240000 (-)                                 | 3-hydroxyisobutyryl-CoA hydrolase                                                            |
| K1 K5 | 1   | 10000   | 80000   | 193         | 1.443         | 0100700 (-)                                 | Plasmodium exported protein                                                                  |
| K1 K5 | 6   | 1270000 | 1300000 | 133         | 2.400         | 0631100 (-)                                 | Plasmodium exported protein (PHISTb)                                                         |
| K1 K5 | 6   | 1330000 | 1350000 | 187         | 0.739         | 0631900 (-)                                 | stevor                                                                                       |
| K1 K5 | 8   | 490000  | 520000  | 36          | 3.192         | 0810100 (-);<br>0809900 (JmjC1)             | ribosomal protein L33, apicoplast;<br>JmjC domain-containing protein, putative               |
| K1 K5 | 10  | 1380000 | 1410000 | 378         | 0.438         | 1035400 (MSP3);<br>1034900 (MRScyt)         | merozoite surface protein 3; methionine--<br>tRNA ligase                                     |
| K1 K5 | 10  | 1590000 | 1640000 | 436         | 0.869         | 1040200 (-)                                 | stevor                                                                                       |
| K1 K5 | 12  | 1680000 | 1740000 | 410         | 0.667         | 1240000 (-)                                 | 3-hydroxyisobutyryl-CoA hydrolase                                                            |
| K1 K6 | 6   | 710000  | 740000  | 84          | 0.796         | 0617200 (-);<br>0617600 (-);<br>0617100 (-) | BFR1 domain-containing protein, putative;<br>stevor;<br>AP-2 complex subunit alpha, putative |
| K1 K6 | 6   | 1250000 | 1300000 | 164         | 2.620         | 0631100 (-);<br>0630100 (-)                 | Plasmodium exported protein (PHISTb);<br>alpha/beta hydrolase, putative                      |
| K1 K6 | 6   | 1320000 | 1370000 | 288         | 1.002         | 0631900 (-)                                 | stevor                                                                                       |
| K1 K6 | 10  | 1380000 | 1410000 | 343         | 0.450         | 1035400 (MSP3);<br>1034900 (MRScyt)         | merozoite surface protein 3;<br>methionine--tRNA ligase                                      |
| K1 K6 | 10  | 1590000 | 1620000 | 161         | 0.694         | 1040200 (-)                                 | stevor                                                                                       |

|       |    |         |         |     |       |                                                       |                                                                                              |
|-------|----|---------|---------|-----|-------|-------------------------------------------------------|----------------------------------------------------------------------------------------------|
| K1 K6 | 12 | 1680000 | 1710000 | 108 | 1.319 | 1240000 (-)                                           | 3-hydroxyisobutyryl-CoA hydrolase, put.                                                      |
| K1 K6 | 12 | 2200000 | 2230000 | 293 | 0.916 | 1254100 (-)                                           | stevor                                                                                       |
| K2 K4 | 1  | 40000   | 80000   | 64  | 1.549 | 0100700 (-)                                           | Plasmodium exported protein, unknown function, fragment                                      |
| K2 K4 | 1  | 170000  | 200000  | 48  | 1.774 | 0104300 (UBP1);<br>0103900 (PIESP15)                  | ubiquitin carboxyl-terminal hydrolase 1;<br>erythrocyte surface protein                      |
| K2 K4 | 3  | 110000  | 140000  | 169 | 0.707 | 0302500 (CLAG3.1);<br>0302200 (CLAG3.2)               | cytoadherence linked asexual protein 3.1;<br>cytoadherence linked asexual protein 3.2        |
| K2 K4 | 4  | 1090000 | 1120000 | 179 | 1.024 | 0424300 (EBA165)                                      | erythrocyte binding antigen-165, pseudo.                                                     |
| K2 K4 | 5  | 60000   | 90000   | 35  | 0.555 | 0501200 (PIESP2);<br>0501300 (SBP1)                   | erythrocyte surface protein;<br>skeleton-binding protein 1                                   |
| K2 K4 | 6  | 710000  | 740000  | 46  | 1.490 | 0617200 (-);<br>0617600 (-);<br>0617100 (-)           | BFR1 domain-containing protein, putative;<br>stevor;<br>AP-2 complex subunit alpha, putative |
| K2 K4 | 6  | 1320000 | 1350000 | 88  | 0.875 | 0631900 (-)                                           | stevor                                                                                       |
| K2 K4 | 9  | 1460000 | 1490000 | 72  | 1.472 | 0937000 (-)                                           | Plasmodium exported protein (PHISTb)                                                         |
| K2 K4 | 10 | 1380000 | 1410000 | 270 | 0.807 | 1035400 (MSP3);<br>1034900 (MRScyt)                   | merozoite surface protein 3;<br>methionine--tRNA ligase                                      |
| K2 K4 | 12 | 900000  | 920000  | 9   | 3.900 | 1222600 (AP2-G)                                       | AP2 domain transcription factor AP2-G                                                        |
| K2 K4 | 12 | 2190000 | 2240000 | 199 | 1.053 | 1254100 (-)                                           | stevor                                                                                       |
| K2 K5 | 1  | 50000   | 80000   | 37  | 1.246 | 0100700 (-)                                           | Plasmodium exported protein                                                                  |
| K2 K5 | 1  | 170000  | 200000  | 41  | 2.210 | 0104300 (UBP1);<br>0103900 (PIESP15)                  | ubiquitin carboxyl-terminal hydrolase 1;<br>erythrocyte surface protein                      |
| K2 K5 | 2  | 870000  | 900000  | 74  | 0.472 | 0221800 (-)                                           | hypothetical protein                                                                         |
| K2 K5 | 3  | 110000  | 140000  | 171 | 0.616 | 0302500 (CLAG3.1);<br>0302200 (CLAG3.2)               | cytoadherence linked asexual protein 3.1;<br>cytoadherence linked asexual protein 3.2        |
| K2 K5 | 4  | 1090000 | 1120000 | 184 | 1.094 | 0424300 (EBA165)                                      | erythrocyte binding antigen-165,<br>pseudogene                                               |
| K2 K5 | 5  | 60000   | 90000   | 38  | 0.599 | 0501200 (PIESP2);<br>0501300 (SBP1)                   | erythrocyte surface protein;<br>skeleton-binding protein 1                                   |
| K2 K5 | 9  | 1460000 | 1490000 | 64  | 1.500 | 0937000 (-)                                           | Plasmodium exported protein (PHISTb)                                                         |
| K2 K5 | 10 | 1380000 | 1410000 | 281 | 0.854 | 1035400 (MSP3);<br>1034900 (MRScyt)                   | merozoite surface protein 3;<br>methionine--tRNA ligase                                      |
| K2 K6 | 1  | 30000   | 70000   | 61  | 1.808 | 0100700 (-)                                           | Plasmodium exported protein                                                                  |
| K2 K6 | 2  | 870000  | 900000  | 66  | 0.961 | 0221800 (-)                                           | hypothetical protein                                                                         |
| K2 K6 | 4  | 1090000 | 1120000 | 171 | 1.015 | 0424300 (EBA165)                                      | erythrocyte binding antigen-165, pseudo.                                                     |
| K2 K6 | 6  | 1320000 | 1350000 | 86  | 1.092 | 0631900 (-)                                           | stevor                                                                                       |
| K2 K6 | 9  | 1460000 | 1490000 | 65  | 1.406 | 0937000 (-)                                           | Plasmodium exported protein (PHISTb)                                                         |
| K2 K6 | 10 | 1380000 | 1410000 | 255 | 0.658 | 1035400 (MSP3);<br>1034900 (MRScyt)                   | merozoite surface protein 3;<br>methionine--tRNA ligase                                      |
| K3 K5 | 1  | 500000  | 530000  | 144 | 0.637 | 0113700 (HSP40)                                       | heat shock protein 40, type II                                                               |
| K3 K5 | 2  | 870000  | 900000  | 103 | 0.494 | 0221800 (-)                                           | hypothetical protein                                                                         |
| K3 K6 | 1  | 500000  | 550000  | 298 | 0.718 | 0113700 (HSP40);<br>0114000 (EPF1);<br>0113900 (CBP1) | heat shock protein 40, type II;<br>exported protein family 1;<br>CX3CL1-binding protein 1    |
| K3 K6 | 2  | 870000  | 900000  | 95  | 0.703 | 0221800 (-)                                           | hypothetical protein                                                                         |
| K4 K5 | 1  | 50000   | 80000   | 82  | 1.936 | 0100700 (-)                                           | Plasmodium exported protein                                                                  |
| K4 K5 | 4  | 530000  | 560000  | 166 | 0.431 | 0412100 (mtRPS12)                                     | ribosomal protein S12, mitochondrial                                                         |
| K4 K5 | 4  | 920000  | 950000  | 103 | 0.569 | 0420400 (RRF2);<br>0420300 (ApiAP2)                   | ribosome-recycling factor;<br>AP2 domain transcription factor, putative                      |
| K4 K5 | 6  | 50000   | 70000   | 38  | 0.902 | 0601500 (-)                                           | Plasmodium exported protein (PHISTb)                                                         |
| K4 K5 | 6  | 710000  | 740000  | 105 | 1.366 | 0617200 (-);<br>0617600 (-);<br>0617100 (-)           | BFR1 domain-containing protein, putative;<br>stevor;<br>AP-2 complex subunit alpha, putative |

|              |    |         |         |     |       |                                                                                  |                                                                                                                                     |
|--------------|----|---------|---------|-----|-------|----------------------------------------------------------------------------------|-------------------------------------------------------------------------------------------------------------------------------------|
| <b>K4 K5</b> | 6  | 1320000 | 1350000 | 157 | 0.570 | 0631900 (-)                                                                      | stevor                                                                                                                              |
| <b>K4 K5</b> | 8  | 480000  | 510000  | 60  | 1.999 | 0809900 (JmjC1)                                                                  | JmjC domain-containing protein, putative                                                                                            |
| <b>K4 K5</b> | 10 | 1380000 | 1410000 | 367 | 0.419 | 1035400 (MSP3);<br>1034900 (MRScyt)                                              | merozoite surface protein 3;<br>methionine--tRNA ligase                                                                             |
| <b>K4 K6</b> | 1  | 30000   | 80000   | 119 | 1.585 | 0100700 (-)                                                                      | Plasmodium exported protein                                                                                                         |
| <b>K4 K6</b> | 3  | 30000   | 60000   | 103 | 0.802 | 0300400 (-)                                                                      | stevor                                                                                                                              |
| <b>K4 K6</b> | 4  | 530000  | 590000  | 186 | 0.951 | 0412100 (mtRPS12)                                                                | ribosomal protein S12, mitochondrial                                                                                                |
| <b>K4 K6</b> | 4  | 920000  | 950000  | 83  | 0.636 | 0420400 (RRF2);<br>0420300 (ApiAP2)                                              | ribosome-recycling factor;<br>AP2 domain transcription factor, putative                                                             |
| <b>K4 K6</b> | 6  | 710000  | 760000  | 88  | 1.403 | 0617900 (H3.3);<br>0617200 (-);<br>0617800 (H2A);<br>0617600 (-);<br>0617100 (-) | histone H3 variant;<br>BFR1 domain-containing protein, putative;<br>histone H2A;<br>stevor;<br>AP-2 complex subunit alpha, putative |
| <b>K4 K6</b> | 10 | 1380000 | 1410000 | 320 | 0.385 | 1035400 (MSP3);<br>1034900 (MRScyt)                                              | merozoite surface protein 3;<br>methionine--tRNA ligase                                                                             |
| <b>K4 K6</b> | 10 | 1600000 | 1630000 | 189 | 0.810 | 1040200 (-)                                                                      | stevor                                                                                                                              |
| <b>K5 K6</b> | 1  | 30000   | 70000   | 100 | 1.490 | 0100700 (-)                                                                      | Plasmodium exported protein,                                                                                                        |
| <b>K5 K6</b> | 3  | 1000000 | 1030000 | 107 | 0.924 | 0323800 (-);<br>0324600 (-)                                                      | conserved Plasmodium protein<br>stevor                                                                                              |
| <b>K5 K6</b> | 6  | 710000  | 740000  | 85  | 0.785 | 0617200 (-);<br>0617600 (-);<br>0617100 (-)                                      | BFR1 domain-containing protein, putative;<br>stevor;<br>AP-2 complex subunit alpha, putative                                        |
| <b>K5 K6</b> | 6  | 1320000 | 1370000 | 267 | 0.994 | 0631900 (-)                                                                      | stevor                                                                                                                              |
| <b>K5 K6</b> | 8  | 480000  | 510000  | 55  | 1.538 | 0809900 (JmjC1)                                                                  | JmjC domain-containing protein, putative                                                                                            |
| <b>K5 K6</b> | 10 | 1600000 | 1650000 | 337 | 0.699 | 1040200 (-)                                                                      | stevor                                                                                                                              |
| <b>K5 K6</b> | 12 | 2190000 | 2280000 | 465 | 1.011 | 1254100 (-)                                                                      | stevor                                                                                                                              |
